# Supplementary material
Source: ML conference proceedings conference paper supplement (https://openaccess.thecvf.com/content/CVPR2024/html/Zhu_SD-DiT_Unleashing_the_CVPR_2024_paper.html)
Supplement: Supplementary file 1 [file Zhu_SD-DiT_Unleashing_the_CVPR_2024_supplemental.pdf]

# SD-DiT: Unleashing the Power of Self-supervised Discrimination in Diffusion Transformer – Supplementary Material

Rui Zhu<sup>1</sup>, Yingwei Pan<sup>2</sup>, Yehao Li<sup>2</sup>, Ting Yao<sup>2</sup>, Zhenglong Sun<sup>1</sup>, Tao Mei<sup>2</sup>, Chang Wen Chen<sup>3</sup>

<sup>1</sup> The Chinese University of HongKong, Shenzhen    <sup>2</sup> HiDream.ai Inc.    <sup>3</sup> The Hong Kong Polytechnic University

ruizhu@link.cuhk.edu.cn, {pandy, liyehao, tiyao}@hidream.ai, sunzhenglong@cuhk.edu.cn

tmei@hidream.ai, changwen.chen@polyu.edu.hk

The supplementary material contains: 1) more implementation details about our proposed Diffusion Transformer with Self-supervised Discrimination (SD-DiT) in Sec. 1; 2) the pseudocode of SD-DiT in Algorithm A1; 3) the qualitative visualization results of SD-DiT-XL/2 in Fig. A1.

## 1. Implementation Details

In contrast to DiT [4] and MDT [2] whose settings are derived from the ADM formulation [1], our SD-DiT employs the formulation of EDM [3] in order to construct the discriminative pairs according to the theory of the *consistency function* (Eq.(7) in main paper) [6] based on the PF-ODE (Eq. (4) in main paper) of EDM. Specifically, we adopt the EDM preconditioning parameterization by using a  $\sigma$ -dependent skip connection<sup>1</sup>:

$$D_\theta(\mathbf{x}; \sigma) = \mathbf{c}_{\text{skip}}(\sigma) \mathbf{x} + \mathbf{c}_{\text{out}}(\sigma) F_\theta(\mathbf{c}_{\text{in}}(\sigma) \mathbf{x}; \mathbf{c}_{\text{noise}}(\sigma)). \quad (1)$$

This preconditioning parameterization is a common practice to avoid large variation in gradient magnitudes brought by various noise levels. As shown in Eq. (1), the denoiser  $D_\theta$  is not directly employed as a neural network. Instead, a different network  $F_\theta$  is trained to learn  $D_\theta$ . In our SD-DiT, the student branch is wrapped as  $D_\theta$  in Eq. (1) with skip connection preconditioning. For simplicity, we did not introduce this parameterization in the main paper. We follow the default hyper-parameters of EDM for the skip connection  $\mathbf{c}_{\text{skip}}(\sigma)$ , the noise level  $\mathbf{c}_{\text{noise}}(\sigma)$  and the input  $\mathbf{c}_{\text{in}}(\sigma)$  and output magnitudes  $\mathbf{c}_{\text{out}}(\sigma)$ . Besides, the student noise distribution  $p_{\sigma_S}$  follows the  $p_{\sigma_{\text{train}}}$  in EDM’s setting:

$$\ln(p_{\sigma_S}) \sim \mathcal{N}(P_{\text{mean}}, P_{\text{std}}), \quad (2)$$

where  $P_{\text{mean}} = -1.2$  and  $P_{\text{std}} = 1.2$ . Note that we draw the approximate log-normal probability density distribution (i.e., the black dashed line in Fig. 6 in main paper) of the corresponding  $\sigma_S$  according to this Eq. (2). During the sampling stage, we use the default time steps schedule of EDM:

$$\sigma_{i < N} = \left( \sigma_{\text{max}}^{\frac{1}{\rho}} + \frac{i}{N-1} (\sigma_{\text{min}}^{\frac{1}{\rho}} - \sigma_{\text{max}}^{\frac{1}{\rho}}) \right)^\rho, \sigma_N = 0, \quad (3)$$

<sup>1</sup>Please refer to EDM [3] for more comprehensive details.

where sampling steps  $N = 40$ ,  $\rho = 7$ ,  $\sigma_{\text{min}} = 0.002$  and  $\sigma_{\text{max}} = 80$ . Following EDM, we utilize the second-order Heun ODE solver for sampling. We follow the paradigm of LDM [5] to perform diffusion generation in the latent space of the frozen pre-trained VAE model [5], which downsamples a  $256 \times 256 \times 3$  image into a  $32 \times 32 \times 4$  latent variable. More implementation details can be referred in Tab. A1.

**Network parameters.** The teacher-student design will double the parameters of a typical DiT. But at inference, the teacher network will be removed, and thus no parameter burden is introduced. In this sense, the model size of learned SD-DiT-XL/2 is 740.6M, which is comparable to MaskDiT-XL/2 (730.1M). During training, the additional teacher network is directly updated by EMA without SGD backward propagation, thereby only requiring extremely lightweight computational cost compared to standard backward propagation. At inference, the teacher network is completely removed and no burden is introduced.

Table A1. Configs for training SD-DiT on 256×256 ImageNet-1K.

| Configs             | SD-DiT-S/2                               | SD-DiT-B/2 | SD-DiT-XL/2 |
|---------------------|------------------------------------------|------------|-------------|
| total batch size    |                                          | 256        |             |
| learning rate       |                                          | 1e-4       |             |
| training iterations | 400k                                     | 400k       | 2400k       |
| optimizer           | AdamW with $\beta_1, \beta_2=0.9, 0.999$ |            |             |
| EMA momentum        | from 0.996 to 0.999                      |            |             |
| student temperature | 0.1                                      |            |             |
| teacher temperature | from 0.09 to 0.099 (warmup 5 epochs)     |            |             |

## 2. Additional Experimental Results

**How about training with a larger batch size?** MaskDiT-XL/2 attains the best FID score with fewer training steps, attributed to a large batch size of 1024. For a more comprehensive comparison, we experiment by training SD-DiT-XL/2 with 1024 batch size, and the FID is 16.78 (150k steps), which is better than MaskDiT-XL/2 (FID: 17.22 at 150k steps) [7].

**Comparison at higher iterations.** We experiment by training SD-DiT-XL/2 with higher iterations (3500k), and the

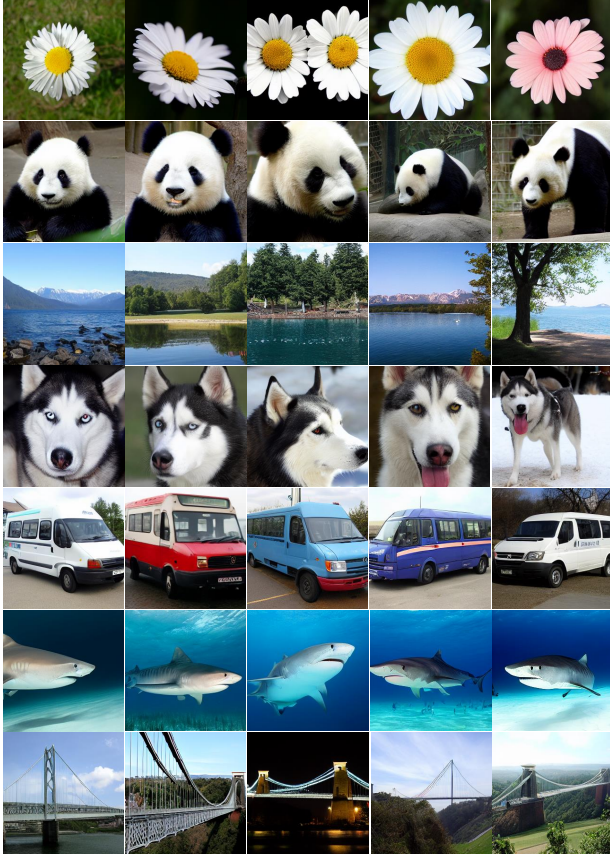

Figure A1. Qualitative results of our SD-DiT-XL/2. Label of each row (from top to bottom): Daisy, Giant panda, Lakeside, Eskimo dog, Minibus, Tiger shark, Suspension bridge.

FID is 6.74, which is comparable to MDT-XL/2 (FID: 6.65, 3500k) [2]. It is worth noting that, compared to , our SD-DiT-XL/2 only uses 45GB memory per GPU with faster training speed (much lower than the memory requirement of MDT-XL/2 [7]), leading to a better computational cost-performance trade-off.

**Classifier-free guidance (CFG) results.** We also experiment by upgrading our SD-DiT with CFG, and the FID of SD-DiT-XL/2 (+CFG) is 3.23, which is better than MaskDiT-XL/2 (without the unmask tuning stage) with CFG (FID: 4.54) [7].

### 3. Pytorch-like Pseudocode for SD-DiT

#### References

- [1] Prafulla Dhariwal and Alexander Nichol. Diffusion models beat gans on image synthesis. In *NeurIPS*, 2021.
- [2] Shanghua Gao, Pan Zhou, Ming-Ming Cheng, and Shuicheng Yan. Masked diffusion transformer is a strong image synthesizer. In *ICCV*, 2023.
- [3] Tero Karras, Miika Aittala, Timo Aila, and Samuli Laine. Elucidating the design space of diffusion-based generative models. In *NeurIPS*, 2022.

#### Algorithm A1 Pytorch-like Pseudocode of SD-DiT

```

# Sθ, Tθ': student & teacher DiT encoder
# Gθ: student DiT decoder
# jθ, jθ': student and teacher MLP projection head
# Ccls: center (K) for cls dicrimitive loss
# Cpatch: center (K) for patch dicrimitive loss
# τS, τT: student and teacher temperatures
# β, mC, mp: the momentum rates of network, center of Ccls, and center of Cpatch
# x0: We extract all the latents from raw image by VAE encoder to directly model our SD-DiT on the basis of Latent Diffusion Model.

Tθ'.params = Sθ.params
for x0 in loader: # load a minibatch with N samples

    # construct noised student and teacher views
    xSσS = x0 + nS, nS ~ N(0, σS2I), σS ∈ [σmin, σmax]
    xTσT = x0 + nT, nT ~ N(0, σT2I)
    # random mask M for student view
    vSσS = xSσS ⊙ (1 - M) # visible patches
    v̄SσS = xSσS ⊙ M # invisible patches
    # forward student and teacher encoder
    eS = Sθ(vSσS) # forward visible student patches
    eT = Tθ'(xTσT) # forward full teacher patches

    ##### Generative Loss #####
    # insert invisible patches onto visible tokens according to mask positions
    H = torch.gather(torch.cat(eS, v̄), M) # feed complete token set to student decoder
    oS = Gθ(H) # output all tokens for generative loss
    LG = MSELoss(oS, x0).mean()

    ##### Discriminative Loss #####
    # forward projection head
    j(eS[cls]), j(eS[patch]) = jθ(eS) # cls token dim: [N,1,K]
    j(eT[cls]), j(eT[patch]) = jθ'(eT) # patch token dim:[N,L,K]
    # inter-view discriminative loss on CLS token
    LD[cls] = H(j(eT[cls]), j(eS[cls]), Ccls)
    # inter-view discriminative loss on patch tokens
    LD[patch] = H(j(eT[patch]), j(eS[patch]), Cpatch)

    ##### Loss and back-propagation #####
    Loss = LG + LD[cls] + LD[patch]
    Loss.backward() # back-propagate
    update(θ) # SGD update for student branch

    # teacher and center updates
    θ'.params = β*θ'.params + (1-β)*θ.params
    # center updates by teacher patches and cls token
    Ccls = mC*Ccls + (1-mC)*j(eT[cls]).mean(dim=0)
    Cpatch = mp*Cpatch + (1-mp)*j(eT[patch]).mean(dim=0, 1)

def H(T, S, C): # cross-entropy loss
    T = T.detach() # stop gradient
    S = softmax(S/τS, dim=1)
    T = softmax((T - C)/τT, dim=1) # center + sharpen
    return - (T * log(S)).sum(dim=1).mean()

```

**Notes:** Note that patch-level discriminative loss is solely performed over the visible patch tokens. Here we do not show them in the pseudocode for simplicity. Moreover, we do not show the skip-connection preconditioning in this pseudocode.

- [4] William Peebles and Saining Xie. Scalable diffusion models with transformers. In *ICCV*, 2023.
- [5] Robin Rombach, Andreas Blattmann, Dominik Lorenz, Patrick Esser, and Björn Ommer. High-resolution image synthesis with latent diffusion models. In *CVPR*, 2022.
- [6] Yang Song, Prafulla Dhariwal, Mark Chen, and Ilya Sutskever. Consistency models. In *ICML*, 2023.
- [7] Hongkai Zheng, Weili Nie, Arash Vahdat, and Anima Anandkumar. Fast training of diffusion models with masked transformers. *arXiv preprint arXiv:2306.09305*, 2023.
